# Supplementary material
Source: PubMed Central journal article supplement (PMC7341947)
Supplement: NIHMS1595380-supplement-supplementary.pdf [file NIHMS1595380-supplement-supplementary.pdf]

## Supporting Information

### Discovery of Lipidome Alterations Following Traumatic Brain Injury *via* High-Resolution Metabolomics.

Scott R. Hogan<sup>1</sup>, John H. Phan<sup>2</sup>, Melissa Alvarado-Velez<sup>2,3</sup>, May Dongmei Wang<sup>2</sup>, Ravi V. Bellamkonda<sup>2,3</sup>, Facundo M. Fernández<sup>\*,1</sup> and Michelle C. LaPlaca<sup>\*,2</sup>

<sup>1</sup>School of Chemistry and Biochemistry, Georgia Institute of Technology, Atlanta, Georgia 30332, United States

<sup>2</sup>Wallace H Coulter Department of Biomedical Engineering, Georgia Institute of Technology, Atlanta, Georgia 30332, United States.

<sup>3</sup>Current address: Department of Biomedical Engineering, Duke University, Pratt School of Engineering, Room 1427, Fitzpatrick CIEMAS, 101 Science Drive, Campus Box 90281, Durham, NC 27708-0281

#### Table of Contents

**Figure S1.** Representative Base Peak Intensity chromatograms for pooled serum samples.

**Figure S2.** Inner vs. outer cross validation performance plot.

**Figure S3.** Frequently selected peaks as prediction model features.

**Figure S4.** Frequently selected peaks as box plots.

**Table S1.** Chromatographic gradients and MS acquisition parameters.

**Table S2.** Detailed chemical (MS/MS) annotation of the 26-feature panel.

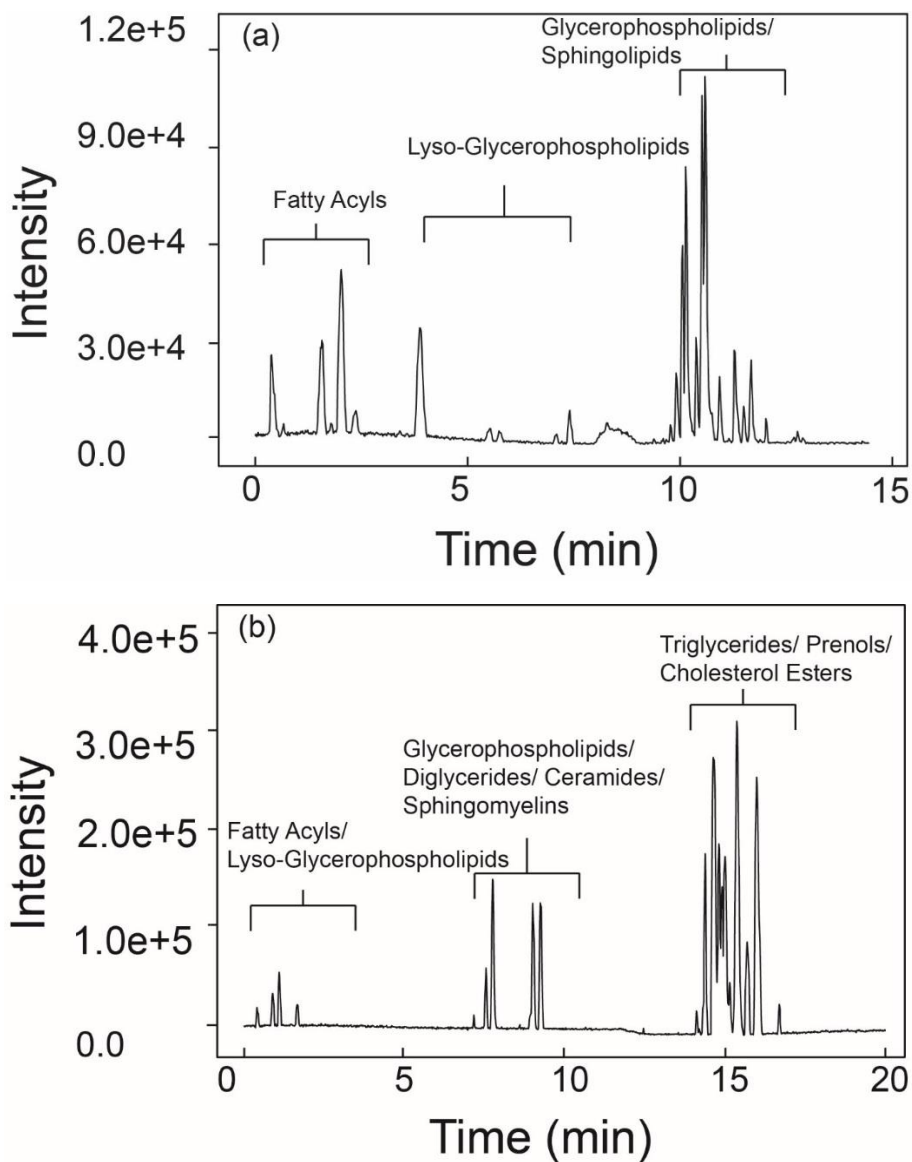

**Supplemental Figure S1:** Lipid coverage following protein precipitation with isopropyl alcohol. Representative Base Peak Intensity (BPI) chromatograms for pooled serum samples analyzed in a) negative ion mode or b) positive ion mode. Common lipid classes observed are labeled by elution region. Positive ion mode typically favors ionization of phosphatidylcholines (PCs) and phosphatidylethanolamines (PEs) which contain an easily ionizable, polar headgroup, while many more classes of lipids can be detected in negative mode.<sup>25</sup>

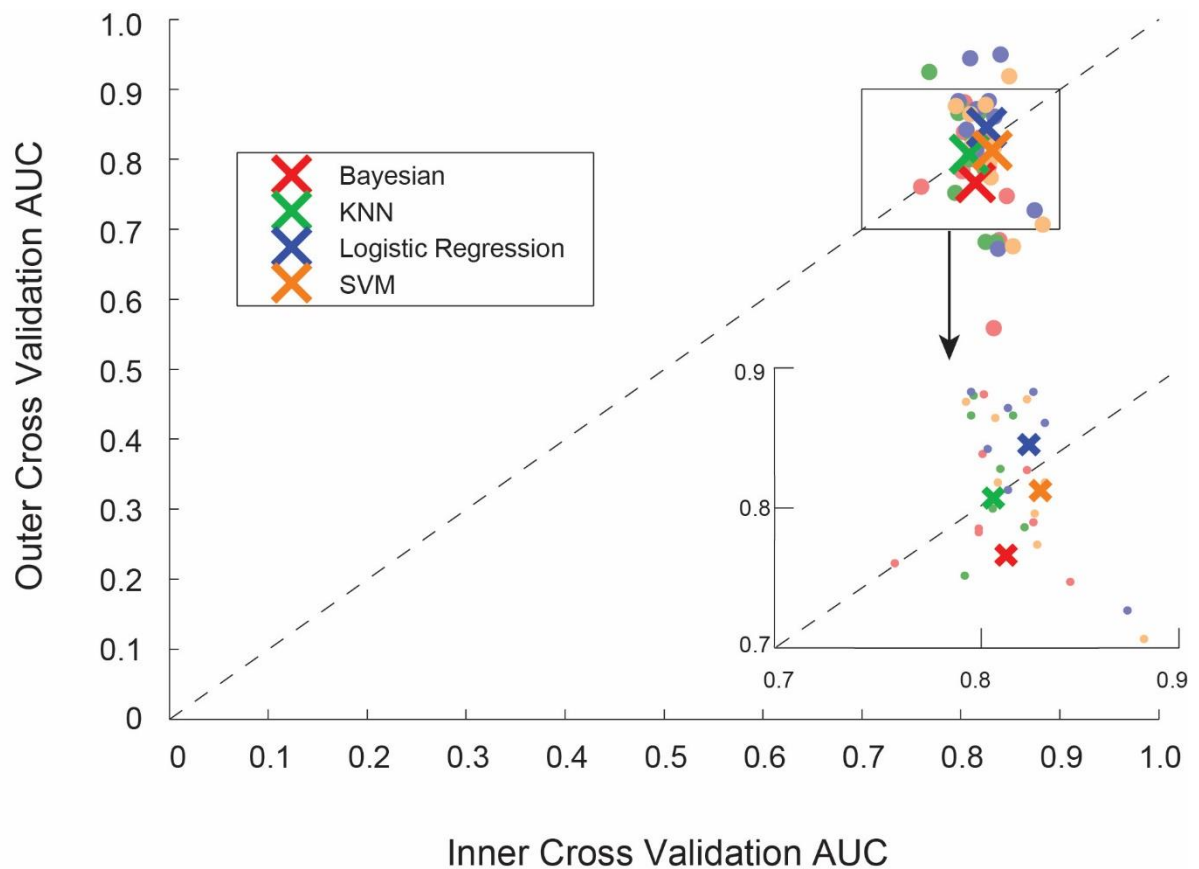

**Supplemental Figure S2:** Estimated nested cross validation performance of TBI prediction modeling is 0.8 AUC. Inner cross validation performance is similar to outer cross validation performance, meaning inner cross validation AUC is an unbiased estimate of outer cross validation AUC. Each point represents one iteration of outer cross validation. The large X's represent the average performance of each of the four classifiers. The region around 0.8 AUC is enlarged for clarity.

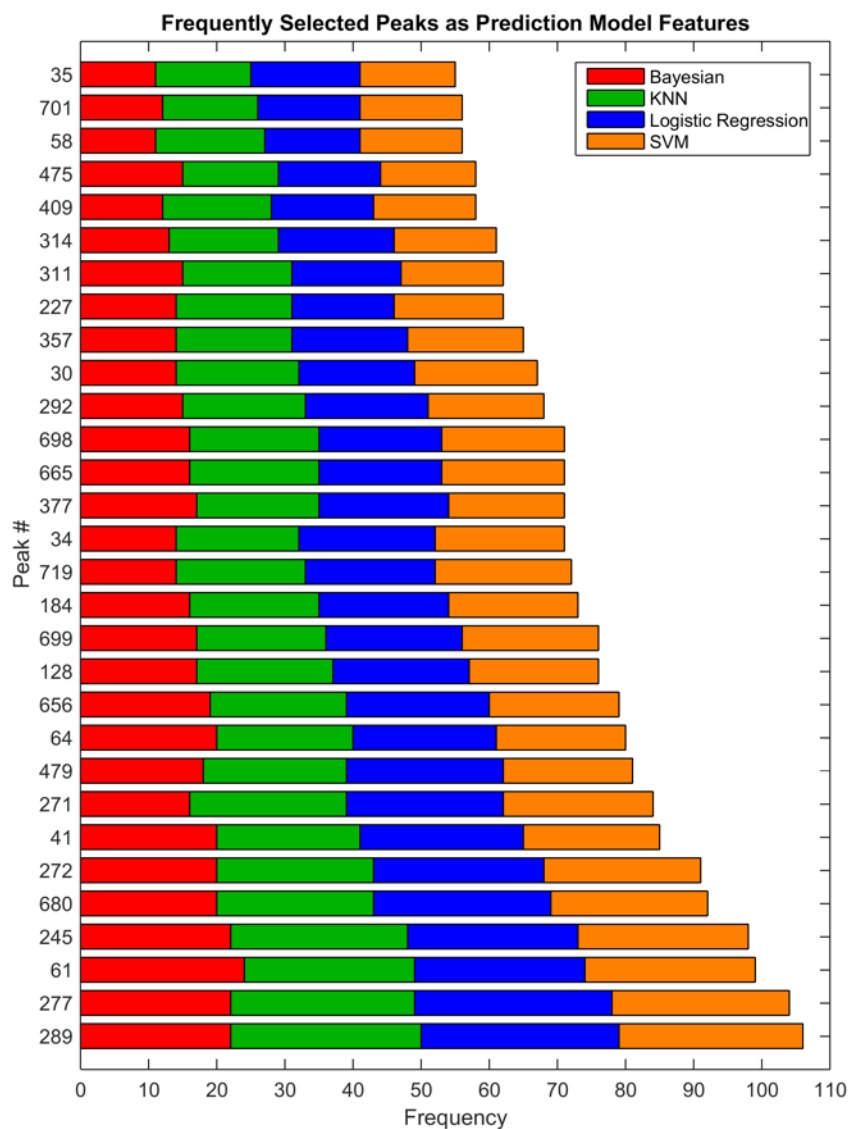

**Supplemental Figure S3:** Most commonly selected features sorted by frequency selected to build classification models – 120 maximum. Features were selected to maximize variance between control and injury groups.

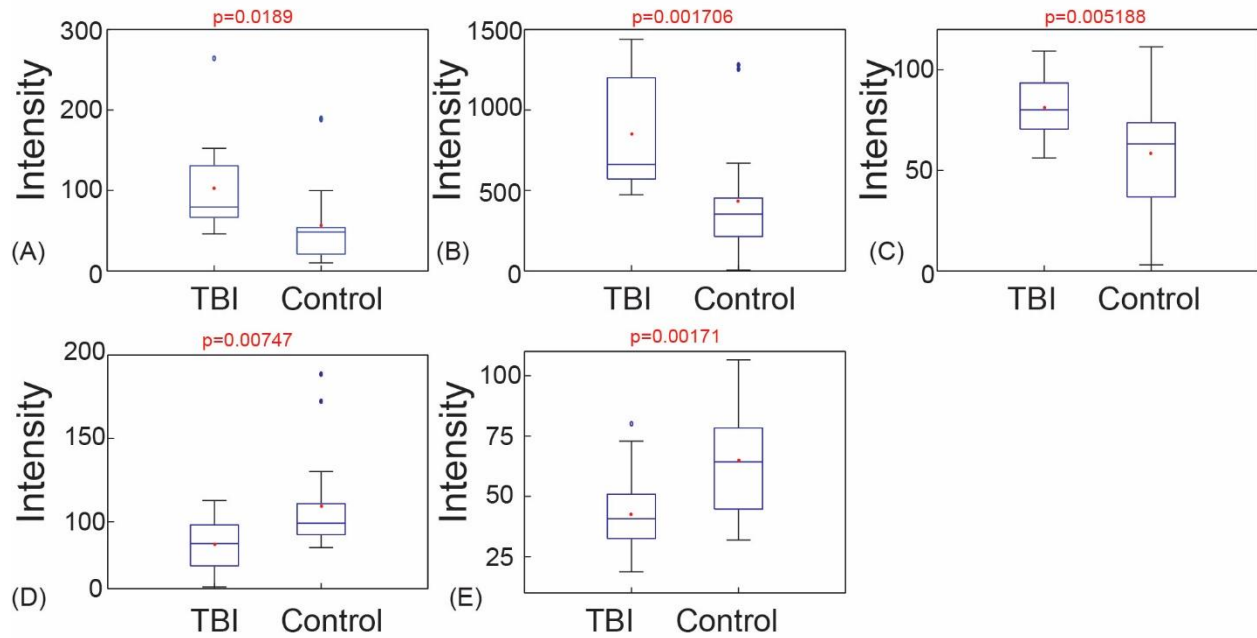

**Supplemental Figure S4:** Box plots depicting features not contained in the 26-feature model, but that were still selected with high frequency by omniClassifier. A) eicosapentaenoic acid,  $[M-H]^- = 301.217$ , #34; B) docosahexaenoic acid,  $[M-H]^- = 327.2322$ , #35; C) LysoPE(20:4),  $[M-H]^- = 500.278$ , #227; D) PE(32:0),  $[M-H]^- = 750.531$ , #30; E) PC(40:4),  $[M+H]^+ = 842.661$ , #475.

**Table S1.** Methods information. S1a) Chromatographic gradients: Mobile Phase A) water: acetonitrile (40:60) and B) 10% acetonitrile in IPA, with 10 mM ammonium formate and 0.1% formic acid additives. S1b) Summary of MS acquisition parameters.

a)

| Negative Mode |     |     | Positive Mode |     |     |
|---------------|-----|-----|---------------|-----|-----|
| Time (min)    | % A | % B | Time (min)    | % A | % B |
| 0             | 95  | 5   | 0             | 70  | 30  |
| 1             | 95  | 5   | 1             | 70  | 30  |
| 3             | 90  | 10  | 3             | 60  | 40  |
| 5             | 80  | 20  | 5             | 54  | 46  |
| 6             | 58  | 42  | 6             | 52  | 48  |
| 10            | 26  | 74  | 10            | 45  | 55  |
| 11            | 10  | 90  | 11            | 30  | 70  |
| 12            | 0   | 100 | 15            | 26  | 74  |
| 14            | 0   | 100 | 18            | 0   | 100 |
|               |     |     | 20            | 0   | 100 |

b)

|                           | Negative mode | Positive Mode |
|---------------------------|---------------|---------------|
| Source capillary voltage  | -2.0 kV       | 3.0 kV        |
| Sampling cone voltage     | 30 V          | 40 V          |
| Extraction cone voltage   | 3 V           | 4 V           |
| Source temperature        | 90° C         | 80° C         |
| Desolvation temperature   | 250° C        | 150° C        |
| Desolvation gas flow rate | 600 L/h       | 600 L/h       |
| Cone gas flow rate        | 50            | 50            |

**Table S2.** Detailed chemical (MS/MS) characteristics of the panel of 26 metabolic features that distinguished TBI and control samples. The fragment ions are listed in the table obtained using the corresponding collision energy (CE). The ions selected for fragmentation are underlined. Each metabolite was identified according to the following four rigor levels: 1) identified compounds matched to authentic compound using standards (accurate mass, isotopic abundances, fragmentation spectrum and retention time matched); 2) putatively annotated compounds (accurate mass, isotopic abundances, and fragmentation spectrum matched to databases or consistent with expected fragmentation patterns); 3) putatively characterized compound classes (accurate mass matched to Lipid Maps, Human Metabolome Database (HMDB) or Metlin database entry, and/or fragmentation showing a few matching characteristic fragment ions, such as lipid head group); and 4) unknown compound.

| Feature ID                     | CE (eV), instrument, polarity | Fragment Ion m/z                                                                                                                 | Relative Intensity                                                           | Fragment Annotation                                                                                                                                                                                                                                                                                                                                            | Specific Comments [ID level]                                       |
|--------------------------------|-------------------------------|----------------------------------------------------------------------------------------------------------------------------------|------------------------------------------------------------------------------|----------------------------------------------------------------------------------------------------------------------------------------------------------------------------------------------------------------------------------------------------------------------------------------------------------------------------------------------------------------|--------------------------------------------------------------------|
| 24<br>PE(20:4_16:0)            | 40 V<br>Xevo (-)              | <u>738.5081</u> ,<br>482.2678,<br>452.2884,<br>434.2673,<br>303.2396,<br>255.2424,<br>196.0369,<br>140.0145,<br>78.9637          | 0.10<br>0.01<br>0.10<br>0.02<br>1.00<br>0.58<br>0.04<br>0.07<br>0.04         | [M - H] <sup>-</sup><br>NL FA 16:0<br>Loss of FA 20:4 as ketene<br>NL FA 20:4<br>[FA 20:4 - H] <sup>-</sup><br>[FA 16:0 - H] <sup>-</sup><br>PE headgroup<br>Ethanolamine phosphate<br>[PO3] <sup>-</sup>                                                                                                                                                      | Consistent with predicted spectrum <sup>1</sup> (Lipid Maps) - [2] |
| 41<br>Arachidonic acid (AA)    | 20 V<br>Xevo (-)              | <u>303.2325</u> ,<br>285.2262,<br>259.2401,<br>231.2073,<br>205.1944,<br>177.1663,<br>59.0131                                    | 1.00<br>0.02<br>0.14<br>0.01<br>0.05<br>0.01<br>0.13                         | [M - H] <sup>-</sup><br>[M - H - H <sub>2</sub> O] <sup>-</sup><br>[M - H - CO <sub>2</sub> ] <sup>-</sup><br>-<br>[C <sub>15</sub> H <sub>25</sub> ] <sup>-</sup><br>-<br>-                                                                                                                                                                                   | Consistent with Lipid Maps database entry [2]                      |
| 58<br>Cer(d18:1_22:0)          | HCD 30<br>QE HF (-)           | <u>666.6058</u> ,<br>620.5979,<br>590.5876,<br>572.5766,<br>380.3528<br>364.3581<br>339.3264<br>321.3159<br>263.2377<br>237.2223 | 0.01<br>1.00<br>0.10<br>0.08<br>0.08<br>0.50<br>0.10<br>0.10<br>0.10<br>0.15 | [M + HCO <sub>2</sub> ] <sup>-</sup><br>[M - H] <sup>-</sup><br>[M - HCHO] <sup>-</sup><br>[M - HCHO - H <sub>2</sub> O] <sup>-</sup><br>NL 240.2 (sphingosine base)<br>NL 256.2 (sphingosine base)<br>[FA 22:0 - H] <sup>-</sup><br>[FA 22:0 - H <sub>2</sub> O] <sup>-</sup><br>C <sub>18</sub> sphingosine fragment<br>C <sub>18</sub> sphingosine fragment | Consistent with predicted spectrum (Lipid Maps) - [2]              |
| 61<br>Cholesterol sulfate (CS) | HCD 30<br>QE HF (-)           | <u>465.3042</u> ,<br>407.2792,<br>210.8419,<br>96.9601                                                                           | 1.00<br>0.15<br>0.03<br>0.53                                                 | [M - H] <sup>-</sup><br>-<br>-<br>[HSO <sub>4</sub> ] <sup>-</sup>                                                                                                                                                                                                                                                                                             | Consistent with spectrum HMDB entry [2]                            |

| Feature ID                                               | CE (eV), instrument, polarity | Fragment Ion m/z                                                                                                                                                                                            | Relative Intensity                                                                                                               | Fragment Annotation                                                                                                                                                                                                                                                                                                                                                                                                                                                                                                                       | Specific Comments [ID level]                                           |
|----------------------------------------------------------|-------------------------------|-------------------------------------------------------------------------------------------------------------------------------------------------------------------------------------------------------------|----------------------------------------------------------------------------------------------------------------------------------|-------------------------------------------------------------------------------------------------------------------------------------------------------------------------------------------------------------------------------------------------------------------------------------------------------------------------------------------------------------------------------------------------------------------------------------------------------------------------------------------------------------------------------------------|------------------------------------------------------------------------|
| 64<br>PC(20:2_18:0)                                      | HCD 30<br>QE HF (-)           | 858.6259,<br>798.6026,<br>727.5843,<br>554.2817,<br>508.3405,<br>391.2258,<br>307.2643,<br>283.2643,<br>224.0694,<br>168.0431,<br>152.9959,<br>78.9588                                                      | 0.09<br>1.00<br>0.01<br>0.01<br>0.01<br>0.02<br>0.17<br>0.10<br>0.02<br>0.44<br>0.03<br>0.53                                     | [M + HCO <sub>2</sub> ] <sup>-</sup><br>[M - CH <sub>3</sub> ] <sup>-</sup><br>Loss of Choline & HCO <sub>2</sub><br>-<br>Loss of FA 20:2 as ketene<br>-<br>[FA 20:2 - H] <sup>-</sup><br>[FA 18:0 - H] <sup>-</sup><br>[GPC - CH <sub>3</sub> - H <sub>2</sub> O] <sup>-</sup><br>Phosphocholine - CH <sub>3</sub><br>Glycerol-3-phosphate - H <sub>2</sub> O<br>[PO <sub>3</sub> ] <sup>-</sup>                                                                                                                                         | Consistent with predicted spectrum (Lipid Maps) - [2]                  |
| 103<br>PC(16:0_16:0)                                     | HCD 30<br>QE HF (-)           | 778.5594,<br>718.5397,<br>480.3098,<br>331.2643,<br>255.2329,<br>224.0693,<br>168.0430,<br>78.9588                                                                                                          | 0.03<br>0.18<br>0.04<br>0.10<br>1.00<br>0.01<br>0.03<br>0.03                                                                     | [M + HCO <sub>2</sub> ] <sup>-</sup><br>[M - CH <sub>3</sub> ] <sup>-</sup><br>Loss of FA 16:0 as ketene<br>-<br>[FA 16:0 - H] <sup>-</sup><br>[GPC - CH <sub>3</sub> - H <sub>2</sub> O] <sup>-</sup><br>Phosphocholine - CH <sub>3</sub><br>[PO <sub>3</sub> ] <sup>-</sup>                                                                                                                                                                                                                                                             | Consistent with predicted spectrum (Lipid Maps) [2] <sup>2</sup>       |
| 118<br>PE(18:2_18:0)<br><br>PC(18:2_16:0)                | HCD 30<br>QE HF (-)           | 742.5406,<br>480.3097,<br>283.2644,<br>279.2332,<br>196.0382,<br>140.0121,<br>78.9589<br><br>742.5397,<br>480.3095,<br>462.2993,<br>279.2329,<br>255.2330,<br>224.0694,<br>168.0430,<br>152.958,<br>78.9588 | 0.10<br>0.05<br>0.36<br>1.00<br>0.03<br>0.04<br>0.03<br><br>0.06<br>0.05<br>0.01<br>1.00<br>0.26<br>0.02<br>0.02<br>0.01<br>0.03 | [M-H] <sup>-</sup><br>Loss of FA 18:2 as ketene<br>[FA 18:0 - H] <sup>-</sup><br>[FA 18:2 - H] <sup>-</sup><br>PE headgroup<br>Ethanolamine Phosphate<br>[PO <sub>3</sub> ] <sup>-</sup><br><br>[M - CH <sub>3</sub> ] <sup>-</sup><br>Loss of FA 18:2 as ketene<br>NL FA 18:2 - CH <sub>3</sub><br>[FA 18:2 - H] <sup>-</sup><br>[FA 16:0 - H] <sup>-</sup><br>[GPC - CH <sub>3</sub> - H <sub>2</sub> O] <sup>-</sup><br>Phosphocholine - CH <sub>3</sub><br>Glycerol-3-phosphate - H <sub>2</sub> O<br>[PO <sub>3</sub> ] <sup>-</sup> | Consistent with predicted structure(s) (Lipid Maps) - [2] <sup>3</sup> |
| 128<br>DG(22:6_18:1)                                     | 30 V<br>Xevo (-)              | 711.5165<br>665.6251<br>268.8004<br>210.8417<br>152.8832<br>92.9277                                                                                                                                         | 0.01<br>0.01<br>0.25<br>0.15<br>0.14<br>1.00                                                                                     | [M + HCO <sub>2</sub> ] <sup>-</sup><br>[M - H] <sup>-</sup><br>-<br>-<br>-<br>-                                                                                                                                                                                                                                                                                                                                                                                                                                                          | Accurate mass match (Lipid Maps) [2] <sup>4</sup> , *                  |
| 129<br>C <sub>43</sub> H <sub>84</sub> NO <sub>8</sub> P | HCD 30<br>QE HF (-)           | 818.5886,<br>758.5708,<br>494.3300,<br>464.3144,<br>446.3045,<br>331.2643,<br>303.2321,<br>281.2485,<br>279.2323,<br>269.2487,                                                                              | 0.01<br>0.36<br>0.03<br>0.05<br>0.02<br>0.05<br>0.36<br>1.00<br>0.40<br>0.38                                                     | [M + HCO <sub>2</sub> ] <sup>-</sup><br>[M - CH <sub>3</sub> ] <sup>-</sup><br>Loss of FA 18:1 as ketene<br>Loss of FA 20:0 as ketene<br>NL FA 20:0 - CH <sub>3</sub><br>[FA 22:4 - H] <sup>-</sup><br>[FA 20:4 - H] <sup>-</sup><br>[FA 18:1 - H] <sup>-</sup><br>[FA 18:0 - H] <sup>-</sup><br>[FA 17:0 - H] <sup>-</sup>                                                                                                                                                                                                               | Consistent with multiple possible PC structures [3]                    |



| Feature ID                            | CE (eV),<br>instrument,<br>polarity | Fragment<br>Ion m/z                                                                                                       | Relative<br>Intensity                                                        | Fragment Annotation                                                                                                                                                                                                                                         | Specific<br>Comments [ID<br>level]                              |
|---------------------------------------|-------------------------------------|---------------------------------------------------------------------------------------------------------------------------|------------------------------------------------------------------------------|-------------------------------------------------------------------------------------------------------------------------------------------------------------------------------------------------------------------------------------------------------------|-----------------------------------------------------------------|
|                                       |                                     | 255.2330,<br>224.0692,<br>168.0430,<br>78.9588                                                                            | 0.12<br>0.03<br>0.04<br>0.05                                                 | [FA 16:0 – H] <sup>-</sup><br>[GPC – CH <sub>3</sub> – H <sub>2</sub> O] <sup>-</sup><br>Phosphocholine – CH <sub>3</sub><br>[PO <sub>3</sub> ] <sup>-</sup>                                                                                                |                                                                 |
| 245<br>Not identified                 | HCD 30<br>QE HF (-)                 | 262.9005,<br>242.9865,<br>222.9825,<br>219.1391,<br>183.1025                                                              | 0.01<br>0.34<br>0.10<br>0.48<br>0.70                                         | -<br>-<br>-<br>-<br>-                                                                                                                                                                                                                                       | ---- [4]                                                        |
| 271<br>DG(22:6_18:2)                  | 10 V<br>Xevo (-)                    | 709.5049,<br>663.6487,<br>549.5652,<br>421.0892,<br>263.0663,<br>229.0138                                                 | 1.00<br>0.05<br>0.10<br>0.07<br>0.04<br>0.02                                 | [M + HCO <sub>2</sub> ] <sup>-</sup><br>[M – H] <sup>-</sup><br>-<br>-<br>-<br>-                                                                                                                                                                            | Accurate mass<br>match (Lipid<br>Maps) [2] <sup>5,*</sup>       |
| 272<br>Docosapentaenoic<br>acid (DPA) | 20 V<br>Xevo (-)                    | 329.2468,<br>311.2415,<br>285.2573,<br>259.1709,<br>231.2135                                                              | 1.00<br>0.15<br>0.30<br>0.05<br>0.10                                         | [M – H] <sup>-</sup><br>[M – H – H <sub>2</sub> O] <sup>-</sup><br>[M – H – CO <sub>2</sub> ] <sup>-</sup><br>-<br>[C <sub>17</sub> H <sub>27</sub> ] <sup>-</sup>                                                                                          | Consistent with<br>Lipid Maps<br>database entry<br>[2]          |
| 277<br>DG(20:4_18:1)                  | 10 V<br>Xevo (+)                    | 660.5562,<br>643.5270,<br>625.5195,<br>447.3466,<br>361.2734,<br>339.2891,<br>287.2368,<br>247.2419                       | 0.05<br>1.00<br>0.38<br>0.10<br>0.20<br>0.40<br>0.05<br>0.12                 | [M + NH <sub>4</sub> ] <sup>+</sup><br>[M + H] <sup>+</sup><br>[M + H – H <sub>2</sub> O] <sup>+</sup><br>-<br>NL FA 18:1 + NH <sub>3</sub><br>NL FA 20:4 + NH <sub>3</sub><br>FA 20:4 [RC=O] <sup>+</sup><br>FA 18:1 [RC=O] <sup>+</sup> -H <sub>2</sub> O | Consistent with<br>predicted<br>spectrum (Lipid<br>Maps) - [2]* |
| 289<br>FFA(18:0)                      | HCD 30<br>QE HF (-)                 | 283.2642,<br>265.1809,<br>254.9863,<br>242.9885,<br>216.9892                                                              | 1.00<br>0.03<br>0.04<br>0.02<br>0.05                                         | [M – H] <sup>-</sup><br>[M – H – H <sub>2</sub> O] <sup>-</sup><br>-<br>-<br>-                                                                                                                                                                              | Consistent with<br>spectrum HMDB<br>entry<br>[2]                |
| 292<br>Not identified                 | HCD 30<br>QE HF (-)                 | 297.0981,<br>255.1352,<br>175.0247,<br>121.0658,<br>113.0244,<br>102.9568,<br>85.0293,<br>75.0084,<br>71.0135,<br>59.0133 | 0.18<br>0.05<br>0.12<br>0.71<br>1.00<br>0.30<br>0.67<br>0.28<br>0.16<br>0.25 | -<br>-<br>-<br>-<br>-<br>-<br>-<br>-<br>-<br>-                                                                                                                                                                                                              | --- [4]                                                         |
| 314<br>FFA(18:2 + 1 O)                | HCD 30<br>QE HF (-)                 | 295.2269,<br>277.2165,<br>253.1188,<br>223.1082,<br>195.1384,<br>171.1022,<br>124.0400,<br>94.0296                        | 1.00<br>0.21<br>0.34<br>0.02<br>0.08<br>0.06<br>0.19<br>0.26                 | [M – H] <sup>-</sup><br>[M – H – H <sub>2</sub> O] <sup>-</sup><br>[M – H – CO <sub>2</sub> ] <sup>-</sup><br>-<br>-<br>-<br>-<br>-                                                                                                                         | Accurate mass<br>match (Lipid<br>Maps) --- [3]                  |

| Feature ID                            | CE (eV), instrument, polarity | Fragment Ion m/z                                                                                                                                               | Relative Intensity                                                                           | Fragment Annotation                                                                                                                                                                                                                                                                                                                                                   | Specific Comments [ID level]                                                                  |
|---------------------------------------|-------------------------------|----------------------------------------------------------------------------------------------------------------------------------------------------------------|----------------------------------------------------------------------------------------------|-----------------------------------------------------------------------------------------------------------------------------------------------------------------------------------------------------------------------------------------------------------------------------------------------------------------------------------------------------------------------|-----------------------------------------------------------------------------------------------|
| 357<br>PE(18:0_22:4)                  | HCD 30<br>QE HF (-)           | <u>794.5697</u> ,<br>528.3086,<br>510.3400,<br>331.2639,<br>303.2324,<br>283.2639,<br>259.2428,<br>224.0691,<br>196.0369,<br>168.0429,<br>152.9957,<br>78.9597 | 0.06<br>0.01<br>0.08<br>0.04<br>1.00<br>0.70<br>0.09<br>0.06<br>0.02<br>0.06<br>0.01<br>0.06 | [M - H] <sup>-</sup><br>Loss of FA 18:0 as ketene<br>NL FA 18:0<br>[FA 22:4 - H] <sup>-</sup><br>[FA 20:4 - H] <sup>-</sup><br>[FA 18:0 - H] <sup>-</sup><br>-<br>[GPC - CH <sub>3</sub> - H <sub>2</sub> O] <sup>-</sup><br>PE headgroup<br>Phosphocholine - CH <sub>3</sub><br>Glycerol-3-phosphate - H <sub>2</sub> O<br>[PO <sub>3</sub> ] <sup>-</sup>           | PE species<br>matched to<br>predicted<br>spectrum [2], #<br>PC species likely<br>co-selected. |
| 377<br>SM(d18:1/22:1)                 | HCD 30<br>QE HF (-)           | <u>829.6448</u><br>769.6223,<br>449.3156,<br>168.0430,<br>78.9589                                                                                              | 0.01<br>1.00<br>0.02<br>0.49<br>0.59                                                         | [M + HCO <sub>2</sub> ] <sup>-</sup><br>[M - CH <sub>3</sub> ] <sup>-</sup><br>Loss of FA 22:1 as ketene<br>Phosphocholine - CH <sub>3</sub><br>[PO <sub>3</sub> ] <sup>-</sup>                                                                                                                                                                                       | Consistent with<br>predicted<br>spectrum (Lipid<br>Maps) - [2], #                             |
| 409<br>LysoPC(20:2)                   | HCD 30<br>QE HF (-)           | <u>592.3619</u> ,<br>532.3398,<br>307.2637<br>242.0794<br>224.0690<br>168.0426<br>152.9954<br>96.9599<br>78.9586                                               | 0.01<br>0.30<br>1.00<br>0.02<br>0.08<br>0.01<br>0.01<br>0.20<br>0.05                         | [M + HCO <sub>2</sub> ] <sup>-</sup><br>[M - CH <sub>3</sub> ] <sup>-</sup><br>[FA 20:2 - H] <sup>-</sup><br>Loss of FA 20:2 as ketene<br>[GPC - CH <sub>3</sub> - H <sub>2</sub> O] <sup>-</sup><br>Phosphocholine - CH <sub>3</sub><br>Glycerol-3-phosphate - H <sub>2</sub> O<br>[H <sub>2</sub> PO <sub>4</sub> ] <sup>-</sup><br>[PO <sub>3</sub> ] <sup>-</sup> | Consistent with<br>predicted<br>spectrum (Lipid<br>Maps) - [2], #                             |
| 479<br>PS(16:0_20:4)                  | HCD 30<br>QE HF (-)           | <u>782.4981</u> ,<br>695.4656,<br>409.2355,<br>391.2251,<br>303.2324,<br>279.2324,<br>255.2328,<br>196.0379,<br>152.9957,<br>140.0115,<br>96.9697,<br>78.9588  | 0.02<br>0.15<br>0.10<br>0.22<br>0.14<br>0.71<br>1.00<br>0.02<br>0.34<br>0.03<br>0.04<br>0.17 | [M-H] <sup>-</sup><br>Loss of serine<br>Loss of FA 20:4 as ketene<br>NL FA 20:4<br>[FA 20:4 - H] <sup>-</sup><br>[FA 18:2 - H] <sup>-</sup><br>[FA 16:0 - H] <sup>-</sup><br>-<br>Glycerol-3-phosphate - H <sub>2</sub> O<br>-<br>[H <sub>2</sub> PO <sub>4</sub> ] <sup>-</sup><br>[PO <sub>3</sub> ] <sup>-</sup>                                                   | Consistent with<br>predicted<br>spectrum (Lipid<br>Maps) - [2], #                             |
| 656<br>DG(22:6_18:1)                  | 20 V<br>Xevo (+)              | <u>684.5526</u><br>667.5300<br>385.2997<br>339.3150<br>311.2371<br>293.2271                                                                                    | 0.01<br>0.05<br>0.17<br>1.00<br>0.08<br>0.05                                                 | [M + NH <sub>4</sub> ] <sup>+</sup><br>[M + H] <sup>+</sup><br>NL FA 18:1 + NH <sub>3</sub><br>NL FA 22:6 + NH <sub>3</sub><br>FA 22:6 [RC=O] <sup>+</sup><br>FA 22:6 [RC=O] <sup>+</sup> - H <sub>2</sub> O                                                                                                                                                          | Consistent with<br>predicted<br>spectrum (Lipid<br>Maps) - [2]                                |
| 665<br>PC(18:1_15:0)<br>PC(17:1_16:0) | HCD 30<br>QE HF (-)           | <u>790.5604</u><br>730.5388<br>506.3244<br>492.3086<br>480.3083<br>466.2934<br>281.2482<br>267.2326<br>255.2327                                                | 0.01<br>0.25<br>0.01<br>0.01<br>0.01<br>0.04<br>1.00<br>0.33<br>0.18                         | [M + HCO <sub>2</sub> ] <sup>-</sup><br>[M - CH <sub>3</sub> ] <sup>-</sup><br>Loss of FA 15:0 as ketene<br>NL FA 18:1<br>NL FA 17:1<br>Loss of FA 18:1 as ketene<br>[FA 18:1 - H] <sup>-</sup><br>[FA 17:1 - H] <sup>-</sup><br>[FA 16:0 - H] <sup>-</sup>                                                                                                           | Consistent with<br>multiple possible<br>PC structures<br>[2], #                               |

| Feature ID                                               | CE (eV), instrument, polarity | Fragment Ion m/z                                                                                                                                               | Relative Intensity                                                                                   | Fragment Annotation                                                                                                                                                                                                                                                                                                                                                                                                             | Specific Comments [ID level]                                                |
|----------------------------------------------------------|-------------------------------|----------------------------------------------------------------------------------------------------------------------------------------------------------------|------------------------------------------------------------------------------------------------------|---------------------------------------------------------------------------------------------------------------------------------------------------------------------------------------------------------------------------------------------------------------------------------------------------------------------------------------------------------------------------------------------------------------------------------|-----------------------------------------------------------------------------|
|                                                          |                               | 241.2170<br>224.0691<br>168.0427<br>78.9587                                                                                                                    | 0.46<br>0.05<br>0.05<br>0.05                                                                         | [FA 15:0 – H] <sup>-</sup><br>[GPC – CH <sub>3</sub> – H <sub>2</sub> O] <sup>-</sup><br>Phosphocholine – CH <sub>3</sub><br>[PO <sub>3</sub> ] <sup>-</sup>                                                                                                                                                                                                                                                                    |                                                                             |
| 680<br>DG(22:6_18:2)                                     | 20 V<br>Xevo (+)              | <u>682.5402</u> ,<br>665.4964,<br>647.4899,<br>385.2837,<br>337.2716,<br>311.2371,<br>293.2271,<br>263.2401,<br>245.2193                                       | 0.02<br>0.10<br>0.05<br>0.18<br>1.00<br>0.10<br>0.10<br>0.10<br>0.05                                 | [M + NH <sub>4</sub> ] <sup>+</sup><br>[M + H] <sup>+</sup><br>[M + H – H <sub>2</sub> O] <sup>+</sup><br>NL FA 18:2 + NH <sub>3</sub><br>NL FA 22:6 + NH <sub>3</sub><br>FA 22:6 [RC=O] <sup>+</sup><br>FA 22:6 [RC=O] <sup>+</sup> – H <sub>2</sub> O<br>FA 18:2 [RC=O] <sup>+</sup><br>FA 18:2 [RC=O] <sup>+</sup> – H <sub>2</sub> O                                                                                        | Consistent with predicted spectrum (Lipid Maps) - [2]                       |
| 698<br>C <sub>47</sub> H <sub>84</sub> NO <sub>8</sub> P | HCD 30<br>QE HF (-)           | <u>866.5910</u><br>806.5698<br>568.3400<br>520.3397<br>494.3244<br>329.2482<br>303.2324<br>295.2637<br>269.2483<br>259.2428<br>224.0691<br>168.0428<br>78.9587 | 0.05<br>0.40<br>0.01<br>0.10<br>0.05<br>0.30<br>1.00<br>0.70<br>0.22<br>0.10<br>0.08<br>0.10<br>0.07 | [M + HCO <sub>2</sub> ] <sup>-</sup><br>[M – CH <sub>3</sub> ] <sup>-</sup><br>-<br>Loss of FA 20:4 as ketene<br>-<br>[FA 22:5 – H] <sup>-</sup><br>[FA 20:4 – H] <sup>-</sup><br>[FA 19:0 – H] <sup>-</sup><br>[FA 17:0 – H] <sup>-</sup><br>[C <sub>19</sub> H <sub>32</sub> ] <sup>-</sup><br>[GPC – CH <sub>3</sub> – H <sub>2</sub> O] <sup>-</sup><br>Phosphocholine – CH <sub>3</sub><br>[PO <sub>3</sub> ] <sup>-</sup> | Consistent with multiple possible PC structures [3], #                      |
| 699<br>LysoPC(18:2 + 1 O)                                | HCD 30<br>QE HF (-)           | <u>582.3412</u><br>522.3202<br>420.5263<br>369.4939<br>304.6898<br>297.2235<br>224.0692<br>168.0430                                                            | 0.01<br>0.90<br>0.05<br>0.05<br>0.41<br>1.00<br>0.12<br>0.05                                         | [M + HCO <sub>2</sub> ] <sup>-</sup><br>[M – CH <sub>3</sub> ] <sup>-</sup><br>-<br>-<br>-<br>[FA 18:2 + 1 O – H] <sup>-</sup><br>[GPC – CH <sub>3</sub> – H <sub>2</sub> O] <sup>-</sup><br>Phosphocholine – CH <sub>3</sub>                                                                                                                                                                                                   | Consistent with predicted spectrum. Fragment matched to feature #314 [2], # |
| 719<br>PC(18:2_22:1)                                     | HCD 30<br>QE HF (-)           | <u>884.6381</u><br>824.6166<br>562.3865<br>544.3866<br>337.3108<br>279.2325<br>224.0690<br>168.0428<br>96.9600                                                 | 0.01<br>0.20<br>0.05<br>0.02<br>0.42<br>1.00<br>0.03<br>0.03<br>0.06                                 | [M + HCO <sub>2</sub> ] <sup>-</sup><br>[M – CH <sub>3</sub> ] <sup>-</sup><br>Loss of FA 18:2 as ketene<br>NL FA 18:2<br>[FA 22:1 – H] <sup>-</sup><br>[FA 18:2] <sup>-</sup><br>[GPC – CH <sub>3</sub> – H <sub>2</sub> O] <sup>-</sup><br>Phosphocholine – CH <sub>3</sub><br>[H <sub>2</sub> PO <sub>4</sub> ] <sup>-</sup>                                                                                                 | Consistent with predicted spectrum (Lipid Maps) - [2], #                    |

<sup>1</sup>[http://www.lipidmaps.org/tools/structuredrawing/GP\\_p\\_form.php](http://www.lipidmaps.org/tools/structuredrawing/GP_p_form.php)

<sup>2</sup>Fragment ions observed were consistent with PC(16:0\_16:0), however, fragment ions corresponding to arachidonic acid (20:4) were also observed in the spectrum, suggesting possible co-selection of precursor ions.

<sup>3</sup>The high resolution of the QE HF instrument revealed two precursors under feature # 118 detected with the lower resolution Xevo instrument. Each was examined individually and matched a specific lipid species.

<sup>4</sup>Although this feature could only be assigned a level 3 confidence based on negative ion mode measurements, it is “paired” to another feature in the panel detected in positive ion mode with a higher level of confidence (feature #656).

<sup>5</sup>Although this feature could only be assigned a level 3 confidence based on negative ion mode measurements, it is “paired” to another feature in the panel detected in positive ion mode with a higher level of confidence (feature #680).

\*Accurate mass matched in negative mode, fragmented in positive mode for FA chain and headgroup info

# Accurate mass matched in positive mode, fragmented in negative mode for FA chain and headgroup info
